# Supplementary material for: Mitochondrial Calcium Signaling Regulates Branched-Chain Amino Acid Catabolism in Fibrolamellar Carcinoma
Source: PubMed Central journal article supplement (PMC11160645; doi:10.1101/2024.05.27.596106), 2024-05-28
Supplement: NIHPP2024.05.27.596106v1-supplement-1.pdf [file NIHPP2024.05.27.596106v1-supplement-1.pdf]

### Supplemental Figure 1:

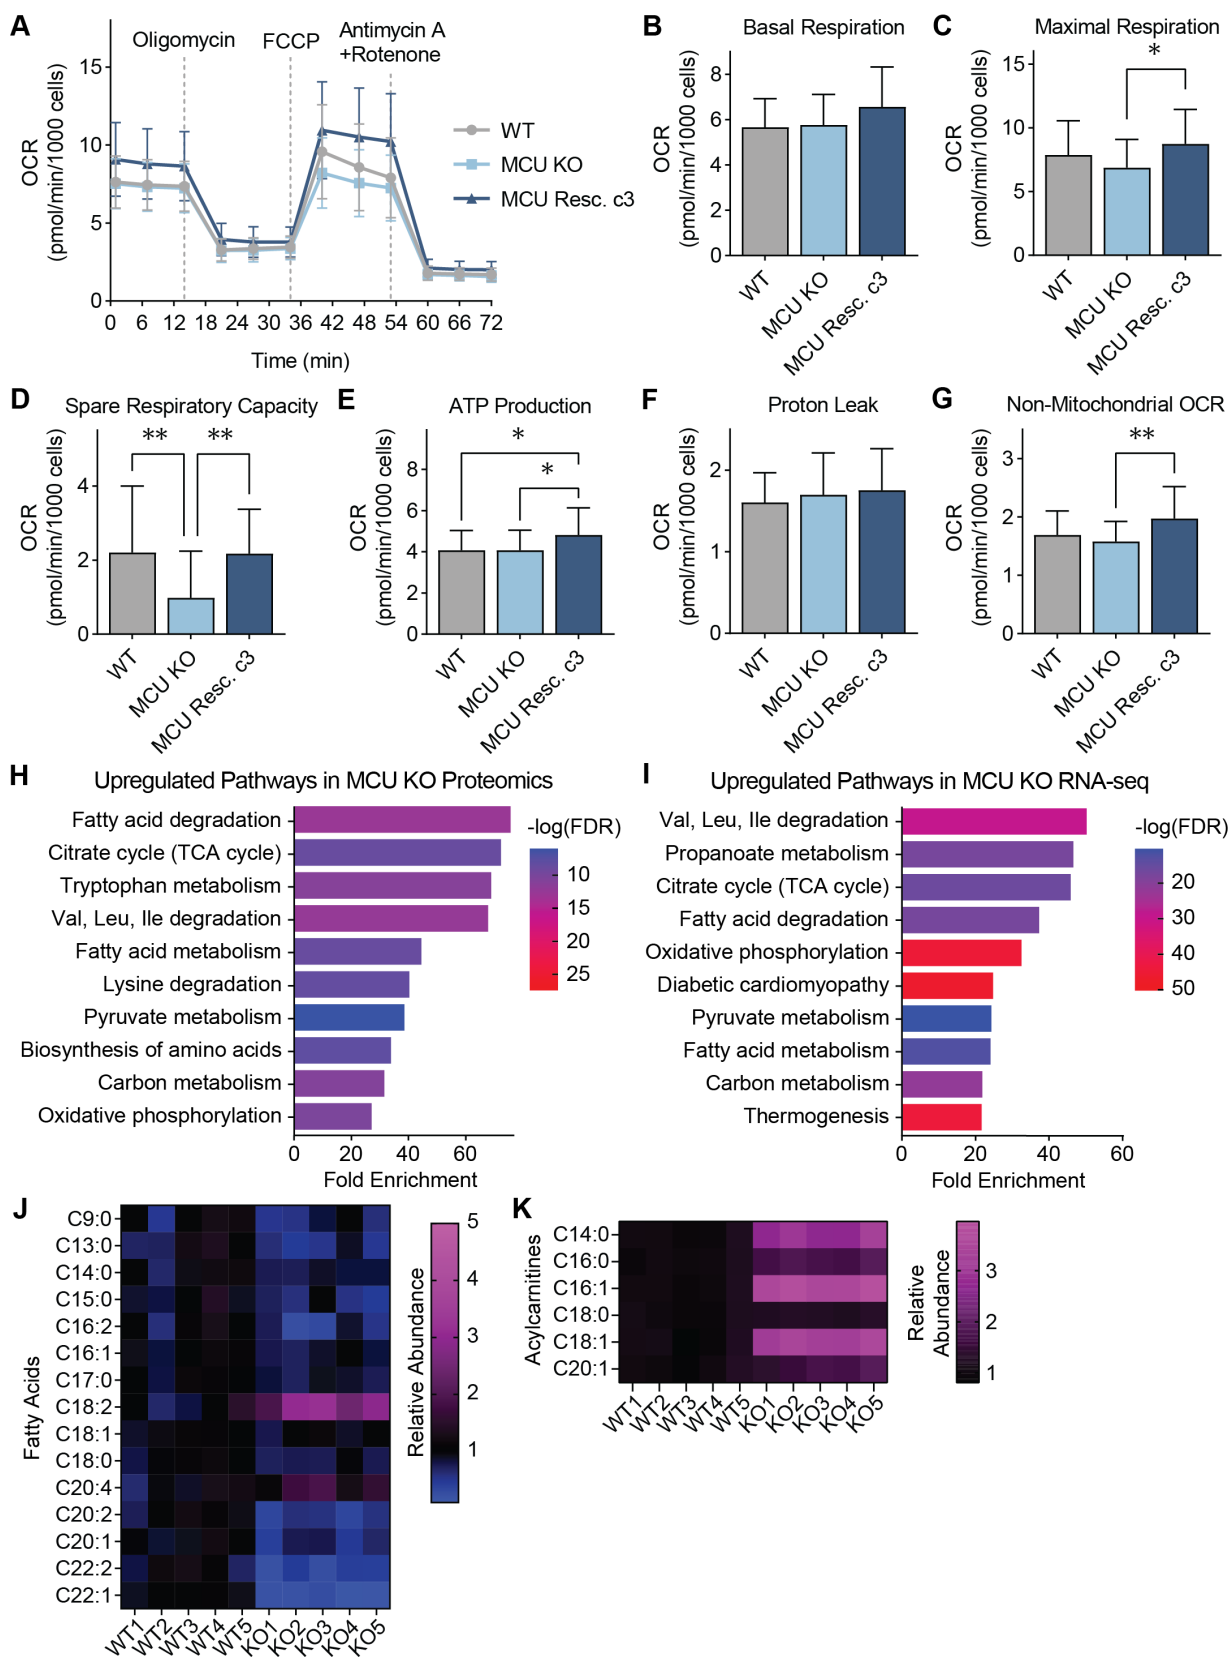

**Supplemental Figure 1: (A-G)** Seahorse extracellular flux analysis in WT, MCU KO, and MCU rescue HeLa cells; n=24-28; oxygen consumption rate at baseline and after indicated treatments are shown in (A);

indicated mitochondrial parameters are shown in (B-G). Statistical significance was determined by the Tukey-Kramer test following one-way ANOVA; n=24-28. **(H-I)** Gene Set Enrichment Analysis of mitochondrial proteins (H) or RNAs coding for mitochondrial proteins (I) that show a statistically significant increase in MCU KO cells compared to WT cells. **(J, K)** Relative abundance of fatty acids (J) and acylcarnitines (K) in WT and MCU KO HeLa cells; loss of MCU decreases steady state levels of very long chain fatty acids, but increases acylcarnitines, suggesting activation of the mitochondrial FAO pathway. Error bars indicate standard deviation; \* indicates a p-value < 0.05, \*\* indicates a p-value < 0.01.

## Supplemental Figure 2:

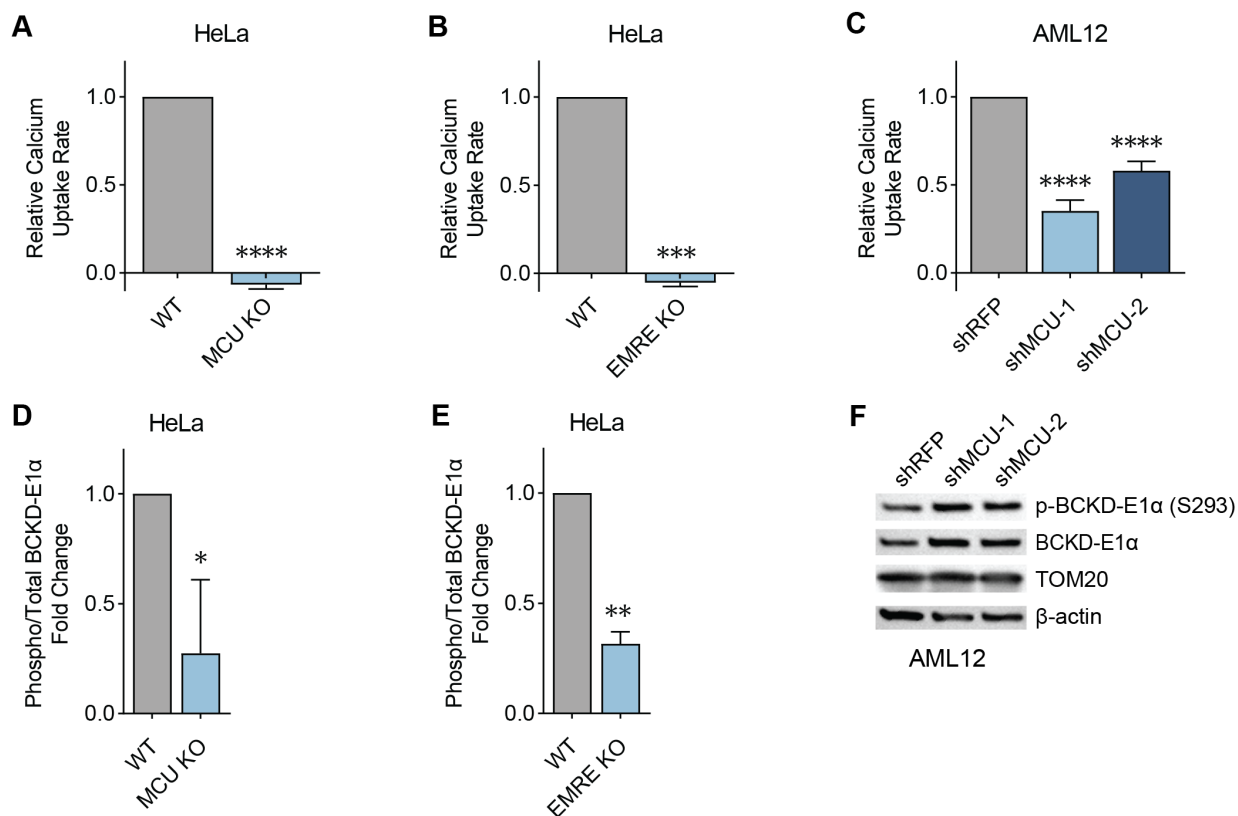

**Supplemental Figure 2: (A-B)** Mitochondrial  $\text{Ca}^{2+}$  uptake rates in MCU KO (A), EMRE KO (B) cells relative to WT controls are shown;  $n=3$ . **(C)** Mitochondrial  $\text{Ca}^{2+}$  uptake rates following MCU knockdown compared to control RFP knockdown in AML12 cells;  $n=8$ . **(D, E)** Quantification of immunoblots in Figure 2G (D) and Fig 2H (E) shown as the relative abundance of phosphorylated BCKD-E1 $\alpha$  to total BCKD-E1 $\alpha$ ;  $n=3$ . **(F)** Immunoblots of phosphorylated and total BCKD-E1 $\alpha$  in AML12 cells with or without MCU knockdown. Error bars indicate standard deviation. \* indicates a p-value < 0.05, \*\* indicates a p-value < 0.01, \*\*\* indicates a p-value < 0.001, and \*\*\*\* indicates a p-value < 0.0001.

### Supplemental Figure 3:

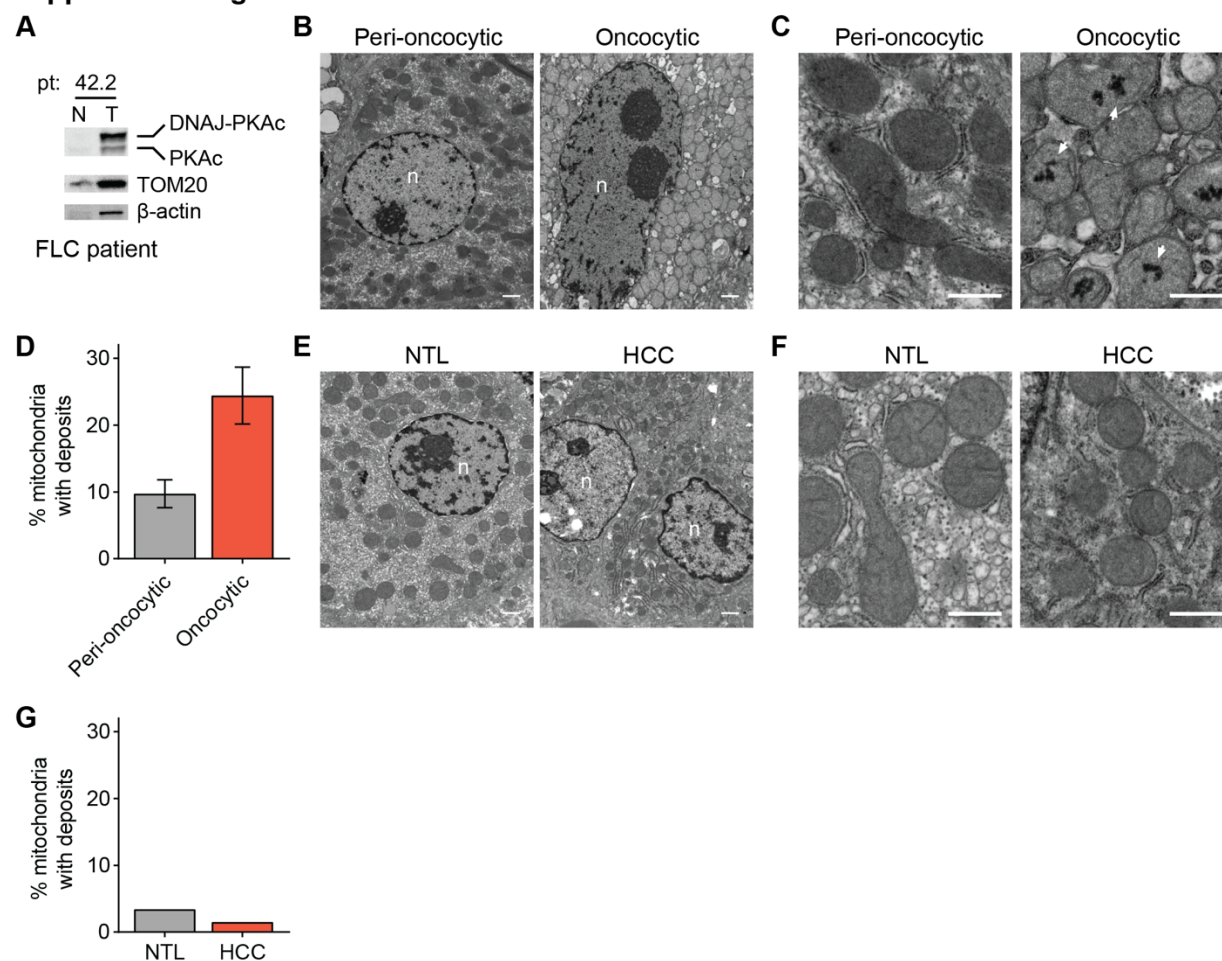

**Supplemental Figure 3: (A)** Immunoblot of tumor (T) and non-tumor liver (N) samples from FLC patient 42.2 showing fusion protein expression. **(B)** Electron micrographs at 10,000x magnification of oncocytic liver cells and proximal cells from the tumor border (peri-oncocyctic) of FLC Patient 42.2; normal tumor sample was not dissected in this surgery; scale bar = 1  $\mu$ m; nuclei are labeled n. **(C)** Electron micrographs of samples shown in (B) at 25,000x magnification; white arrowheads mark representative  $\text{Ca}^{2+}$  deposits in the oncocytic cells; scale bar = 600 nm. **(D)** Percentage of mitochondria with  $\text{Ca}^{2+}$  deposits in EM samples shown in (C); the mean is reported from manual counting of >500 mitochondria per sample by two independent, blinded analysts; error bars indicate standard deviation. **(E)** Electron micrographs at 10,000x magnification of non-tumor (NTL) and tumor sections from HCC patient 7; scale bar = 1  $\mu$ m; nuclei are labeled n. **(F)** Electron micrographs of samples shown in (F) at 25,000x magnification; scale bar = 600 nm. **(G)** Percentage of mitochondria with  $\text{Ca}^{2+}$  deposits in EM samples shown in (F); >100 mitochondria per sample were quantified by an independent, blinded analyst

### Supplemental Figure 4:

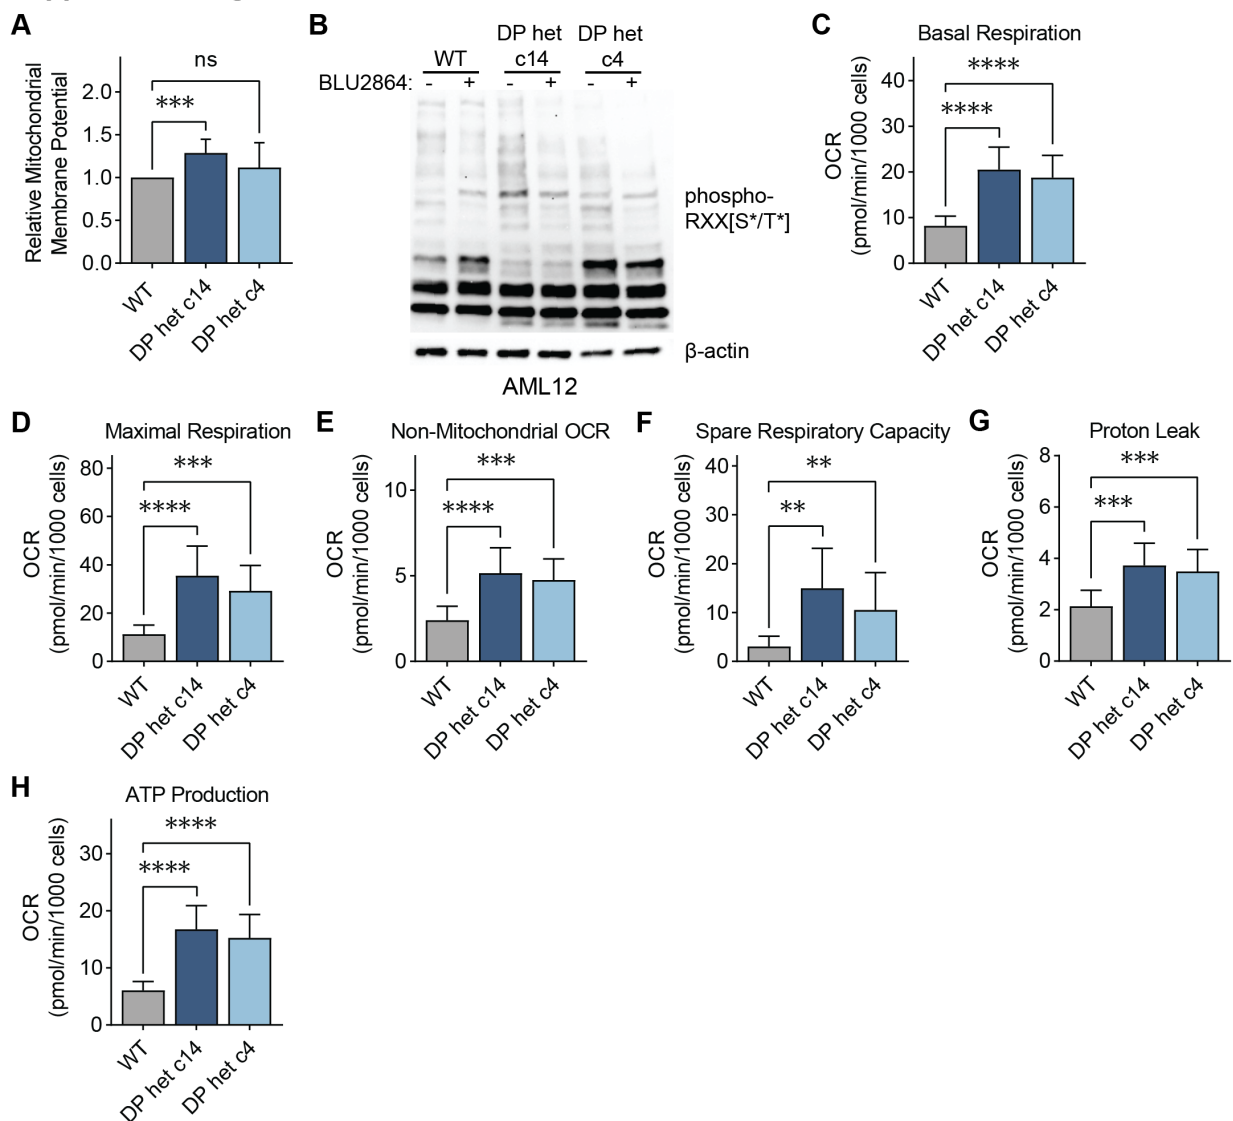

**Supplemental Figure 4:** (A) Resting mitochondrial membrane potential measured by the difference in TMRM fluorescence before and after CCCP addition, normalized to WT AML12 cells. (B) Immunoblot of AML12 lysates with a PKA substrate motif antibody after 5  $\mu$ M BLU2864 or DMSO treatment for 4 days. (C-G) Indicated mitochondrial parameters of AML12 cells from Seahorse extracellular flux analysis in Figure 4L; statistical significance determined by the Dunnett test following Welch's one-way ANOVA; n=10-16. All error bars indicate standard deviation; ns indicates non-significant, \*\* indicates a p-value < 0.01, \*\*\* indicates a p-value < 0.001, and \*\*\*\* indicates a p-value < 0.0001

### Supplemental Figure 5:

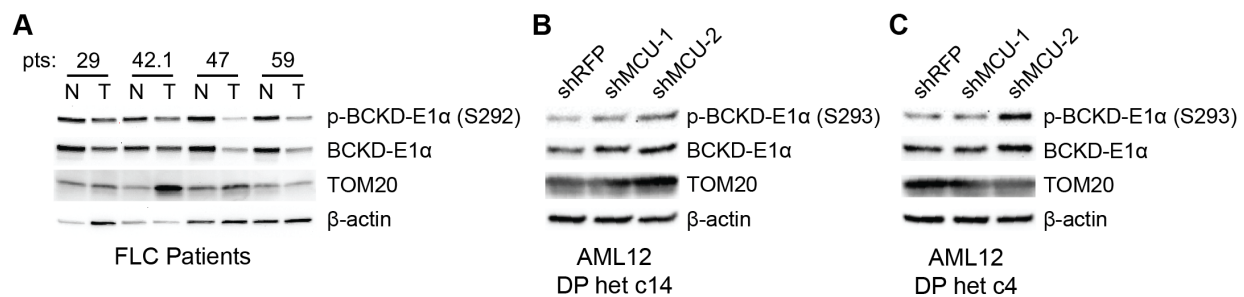

**Supplemental Figure 5: (A)** Immunoblots of phosphorylated and total BCKD-E1α in non-tumor (N) and tumor (T) lysates from FLC patients. **(B, C)** Immunoblots of phosphorylated and total BCKD-E1α in c14 (B) and c4 (C) after MCU knockdown.

### Supplemental Table 1. Patient Information

| <b>Patient ID</b> | <b>Diagnosis</b>                         | <b>Age</b> | <b>Sex</b> |
|-------------------|------------------------------------------|------------|------------|
| 7                 | Hepatocellular carcinoma; history of HCV | 70         | Female     |
| 9                 | Fibrolamellar carcinoma                  | 27         | Male       |
| 17                | Fibrolamellar carcinoma                  | 14         | Female     |
| 29                | Fibrolamellar carcinoma                  | 20         | Male       |
| 42.1*             | Fibrolamellar carcinoma                  | 26         | Male       |
| 42.2*             | Fibrolamellar carcinoma                  | 27         | Male       |
| 47                | Fibrolamellar carcinoma                  | 26         | Male       |
| 58                | Fibrolamellar carcinoma                  | 18         | Female     |
| 59                | Fibrolamellar carcinoma                  | 18         | Female     |

\*Patient 42.1 and 42.2 refer to the same individual; the latter resection was performed following tumor recurrence.
